# Supplementary material
Source: PubMed Central journal article supplement (PMC5619967)
Supplement: ASN.2016121380SupplementaryData.pdf [file ASN.2016121380SupplementaryData.pdf]

## Supplement

**Table S1: Crude death-censored and all-cause graft failure rates (failures per 100 person-years) by recipient age, recipient sex, and donor sex**

| Recipient current age (years)               | Female donor     |                | Male donor       |                |
|---------------------------------------------|------------------|----------------|------------------|----------------|
|                                             | Female recipient | Male recipient | Female recipient | Male recipient |
| Death-censored graft failure rates (95% CI) |                  |                |                  |                |
| 0-14                                        | 5.0 (3.3, 6.7)   | 4.2 (2.9, 5.5) | 5.9 (4.6, 7.3)   | 3.9 (3.0, 4.9) |
| 15-24                                       | 7.2 (5.6, 8.7)   | 6.4 (5.1, 7.6) | 6.8 (5.6, 7.9)   | 5.3 (4.4, 6.2) |
| 25-44                                       | 4.6 (4.1, 5.1)   | 4.4 (4.0, 4.9) | 4.1 (3.7, 4.5)   | 3.9 (3.6, 4.2) |
| ≥45                                         | 3.3 (3.0, 3.5)   | 3.7 (3.5, 3.9) | 2.9 (2.7, 3.1)   | 2.9 (2.8, 3.1) |
| All cause graft failure rates (95% CI)      |                  |                |                  |                |
| 0-14                                        | 5.6 (3.8, 7.5)   | 4.6 (3.3, 6.0) | 6.5 (5.1, 7.9)   | 4.3 (3.3, 5.3) |
| 15-24                                       | 7.9 (6.3, 9.5)   | 6.9 (5.5, 8.2) | 7.3 (6.1, 8.5)   | 5.8 (4.9, 6.7) |
| 25-44                                       | 5.8 (5.3, 6.4)   | 5.8 (5.4, 6.3) | 5.3 (4.9, 5.8)   | 5.3 (4.9, 5.7) |
| ≥45                                         | 7.3 (6.9, 7.7)   | 8.5 (8.2, 8.8) | 6.7 (6.4, 7.1)   | 7.4 (7.1, 7.7) |

### All-cause graft survival

The results of Cox models comparing all-cause graft failure rates (defined as death, retransplantation, or return to dialysis) between female and male recipients, stratified by donor sex, were similar to those described for death-censored graft failure (Figure S1). The only substantial difference was that among those ≥45 years, female recipients had significantly lower all-cause graft failure rates compared with male recipients regardless of donor sex: the aHR for female recipients (vs. male) was 0.96 [95% CI, 0.93-0.98] when the donor was male and 0.92 [95% CI, 0.89-0.94] when the donor was female. Differences in the results of analyses examining all-cause graft failure, compared with death-censored graft failure, are likely driven primarily by the well-known longer life expectancy of females than males.<sup>1</sup>

**Figure S1 (a): Male donor**

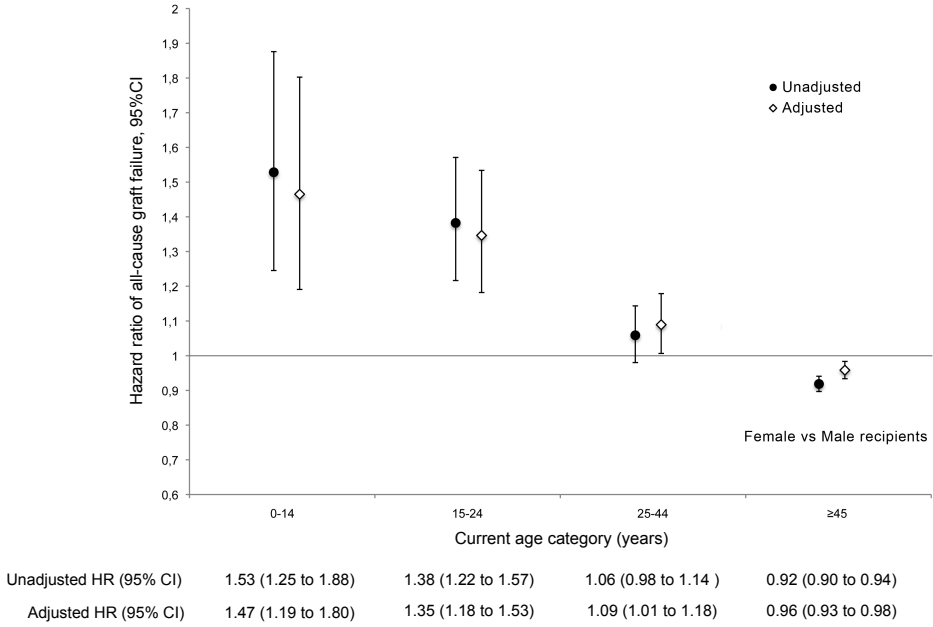

**Figure S1 (b): Female donor**

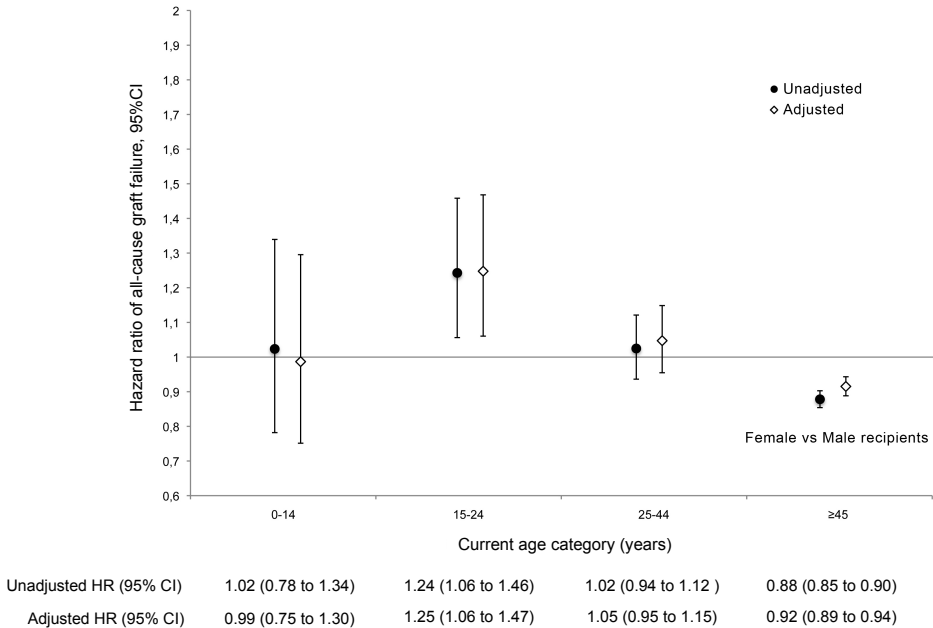

**Figure S1: Relative hazards of all-cause graft failure in female compared with male recipients of (a) male and (b) female donors.** Hazard ratios are shown with 95% confidence intervals (95% CI) for female recipients with male as the reference. Final models were adjusted for race, primary cause of renal disease, duration of dialysis pre-transplant, donor age, donor weight, recipient weight and panel reactive antibody.

**Figure S2 (a): Male donor**

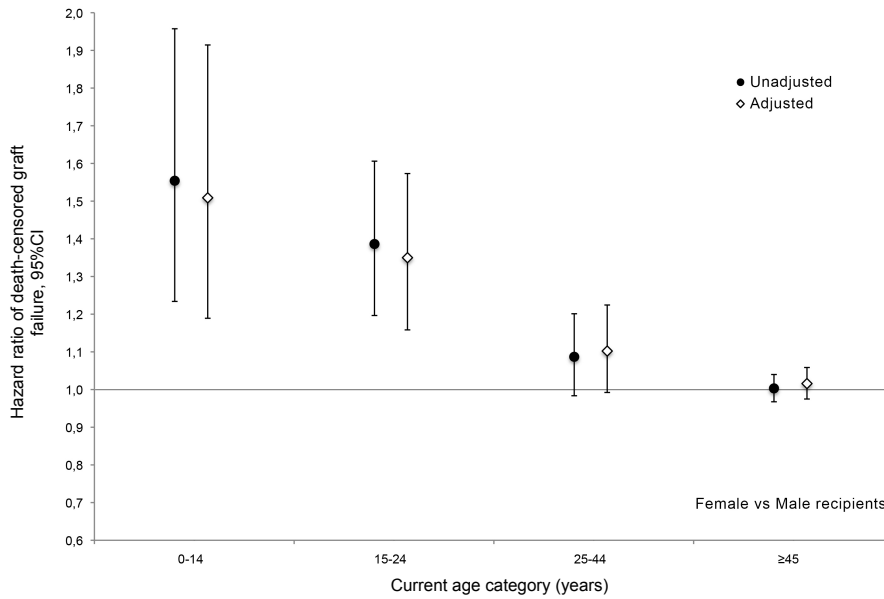

|                        |                     |                     |                     |                     |
|------------------------|---------------------|---------------------|---------------------|---------------------|
| Unadjusted HR (95% CI) | 1.55 (1.23 to 1.96) | 1.39 (1.20 to 1.61) | 1.09 (0.98 to 1.20) | 1.00 (0.97 to 1.04) |
| Adjusted HR (95% CI)   | 1.51 (1.19 to 1.91) | 1.35 (1.16 to 1.57) | 1.10 (0.99 to 1.22) | 1.02 (0.97 to 1.06) |

**Figure S2 (b): Female donor**

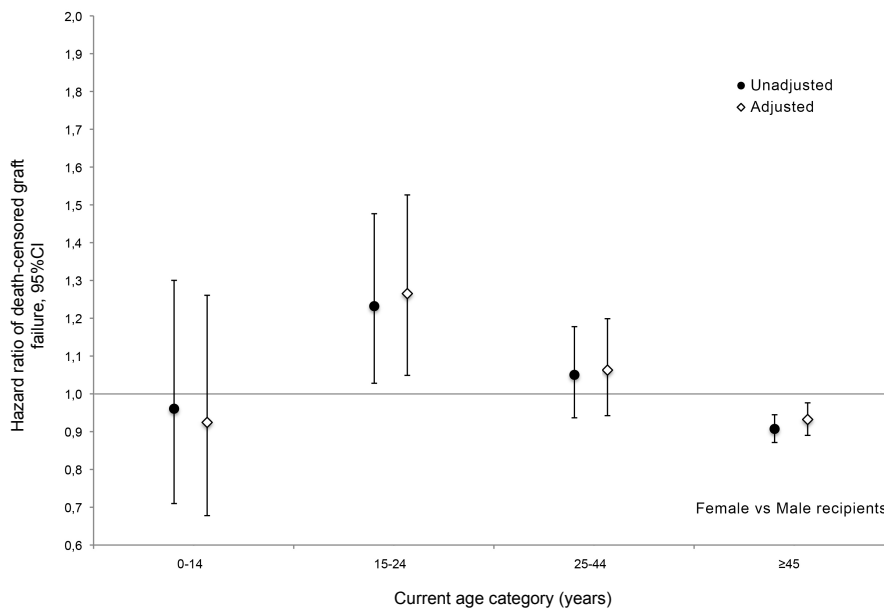

|                        |                     |                     |                     |                     |
|------------------------|---------------------|---------------------|---------------------|---------------------|
| Unadjusted HR (95% CI) | 0.96 (0.71 to 1.30) | 1.23 (1.03 to 1.48) | 1.05 (0.94 to 1.18) | 0.91 (0.87 to 0.94) |
| Adjusted HR (95% CI)   | 0.92 (0.68 to 1.26) | 1.27 (1.05 to 1.53) | 1.06 (0.94 to 1.20) | 0.93 (0.89 to 0.98) |

**Figure S2: Relative hazards of death-censored graft failure (adjusted for donor and recipient height, rather than weight) in female compared with male recipients of (a) male and (b) female donors.** Hazard ratios are shown with 95% confidence intervals (95% CI) for female recipients with male as the reference. Final models were adjusted for race, primary cause of renal disease, duration of dialysis pre-transplant, donor age, donor height, recipient height and panel reactive antibody.

**Figure S3 (a): Male donor**

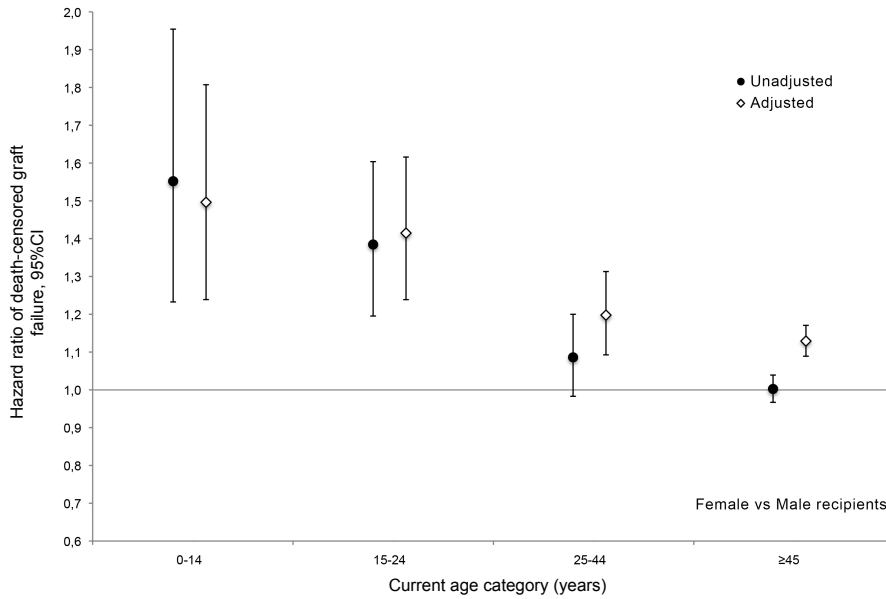

|                        |                     |                     |                      |                      |
|------------------------|---------------------|---------------------|----------------------|----------------------|
| Unadjusted HR (95% CI) | 1.55 (1.23 to 1.96) | 1.39 (1.20 to 1.61) | 1.09 (0.98 to 1.20 ) | 1.00 (0.97 to 1.04)  |
| Adjusted HR (95% CI)   | 1.50 (1.24 to 1.81) | 1.42 (1.24 to 1.62) | 1.20 (1.09 to 1.31 ) | 1.13 (1.09 to 1.17 ) |

**Figure S3 (b): Female donor**

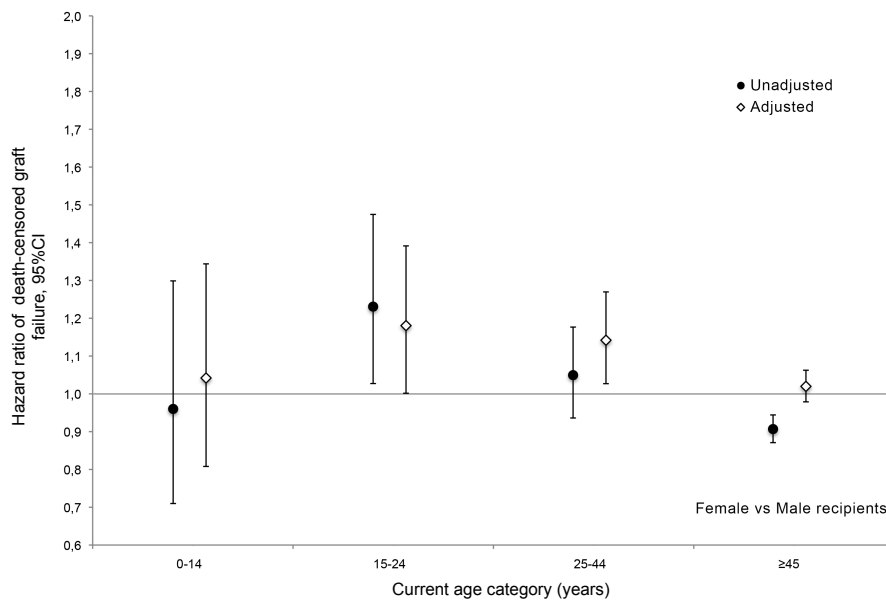

|                        |                     |                     |                      |                     |
|------------------------|---------------------|---------------------|----------------------|---------------------|
| Unadjusted HR (95% CI) | 0.96 (0.71 to 1.30) | 1.23 (1.03 to 1.48) | 1.05 (0.94 to 1.18 ) | 0.91 (0.87 to 0.94) |
| Adjusted HR (95% CI)   | 1.04 (0.81 to 1.35) | 1.18 (1.00 to 1.39) | 1.14 (1.03 to 1.27 ) | 1.02 (0.98 to 1.06) |

**Figure S3: Relative hazards of death-censored graft failure (adjusted for donor and recipient body surface area, rather than weight) in female compared with male recipients of (a) male and (b) female donors.** Hazard ratios are shown with 95% confidence intervals (95% CI) for female recipients with male as the reference. Final models were adjusted for race, primary cause of renal disease, duration of dialysis pre-transplant, donor age, donor body surface area, recipient body surface area and panel reactive antibody.

**Figure S4 (a): Male donor**

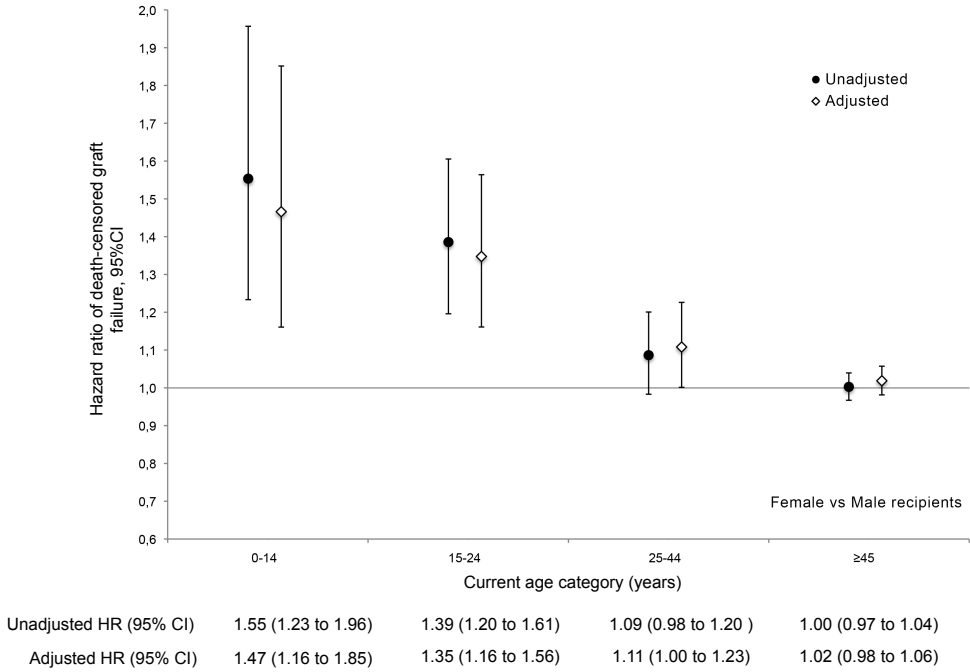

**Figure S4 (b): Female donor**

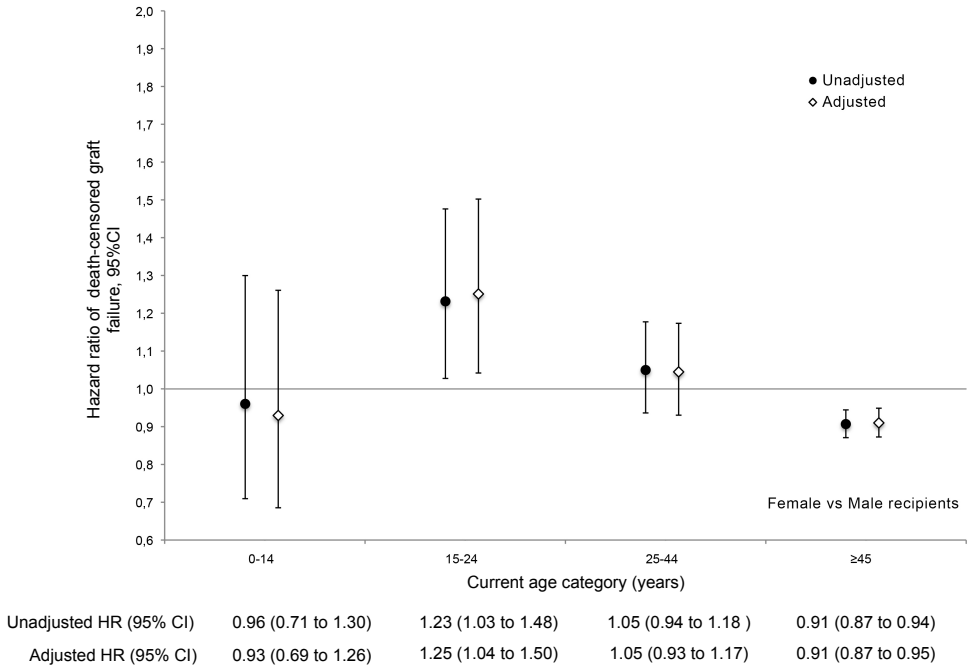



**Figure S4: Relative hazards of death-censored graft failure (adjusted for donor:recipient weight ratio, rather than donor weight and recipient weight) in female compared with male recipients of (a) male and (b) female donors.** Hazard ratios are shown with 95% confidence intervals for female recipients with male as reference. Final models were adjusted for race, primary cause of renal disease, duration of dialysis pre-transplant, donor age, donor:recipient weight ratio and panel reactive antibody.

**Figure S5 (a):**

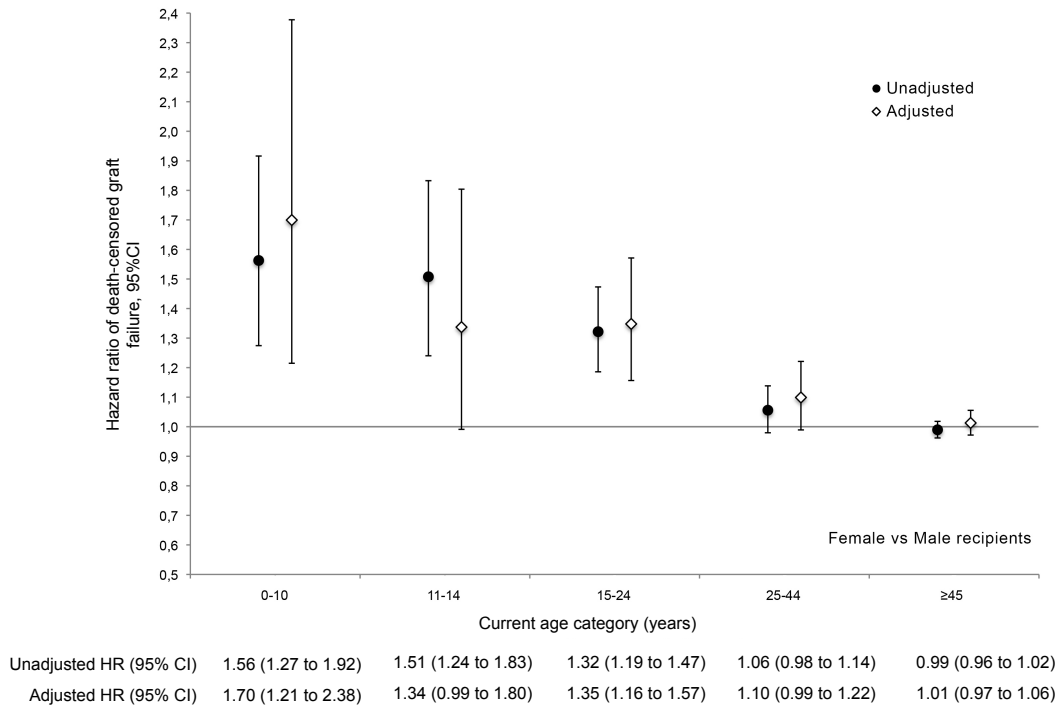

**Figure S5 (b):**

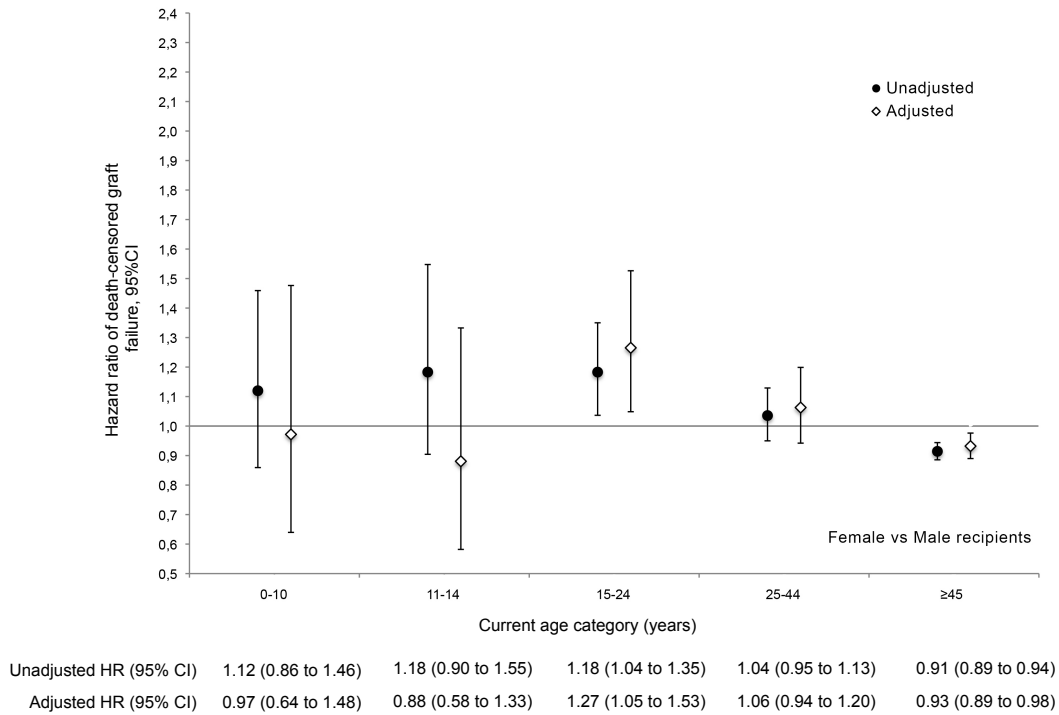

**Figure S5: Relative hazards of death-censored graft failure in female compared with male recipients of (a) male and (b) female donors, with additional age categories.** Hazard ratios are shown with 95% confidence intervals for female recipients, with male as reference. Final models were adjusted for race, primary cause of renal disease, duration of dialysis pre-transplant, donor age, donor height, recipient height and panel reactive antibody.

1. Vanderbloemen L, Dorling D, Minton J: Visualising variation in mortality rates across the life course and by sex, USA and comparator states, 1933-2010. *J. Epidemiol. Community Health* 70: 826–831, 2016
